# Supplementary material for: The Dynamics of Stimulus Selection in the Nucleus Isthmi Pars Magnocellularis of Avian Midbrain Network
Source: Research Square preprint supplement (doi:10.21203/rs.3.rs-5665397/v1), 2025-03-25
Supplement: Supplementary file 1 [file 2425131721967022baa28257.docx]

Fig. S1. The response of Imc neurons by constant relative size spatial competition protocol (CRS-SCP); A, Diagram of CRS-SCP. Quadrilateral, Tangent monitor; dashed oval, RF of recorded Imc neuron. Square, visual translational motor stimulus S1 (right) and S2 (left); B, C, D, E, Responses of an example Imc neuron with gradual-like and switch-like competitor response profile base on A protocols. B, D, Raster plot of responses of the example Imc neuron to A protocols. The size of the S1 is constant at 0.9°, the longitudinal axis represents the different S2 sizes. Shaded along the x-axis represents stimulus duration (500ms) during which response firing rates were calculated. C, E, Response firing rates corresponding to raster plot in B and D. Open circles are response firing rates (mean ± SEM). Correlation coefficient of responses versus S2 strength = -0.82 (p = 0.02, blue data in C), -0.9 (p = 0.006, red data in E), Pearson correlation test. Solid line, best fitting sigmoid to the competitor response profile (r2 = 0.98 in C, 0.99 in E); black arrowhead, strength of S1 (0.9°).

Fig. S2. The response of Imc neurons by constant relative contrast spatial competition protocol (CRC-SCP); A, Diagram of CRC-SCP. Quadrilateral, Tangent monitor; dashed oval, RF of recorded Imc neuron. Square, visual translational motor stimulus S1 (right) and S2 (left); B, C, D, E, Responses of an example Imc neuron with gradual-like and switch-like competitor response profile base on A protocols. B, D, Raster plot of responses of the example Imc neuron to A protocols. The contrast of the S1 is constant at 0.68, the longitudinal axis represents the different S2 contrasts. Shaded along the x-axis represents stimulus duration (500ms) during which response firing rates were calculated. C, E, Response firing rates corresponding to raster plot in B and D. Open circles are response firing rates (mean ± SEM). Correlation coefficient of responses versus S2 strength = -0.96 (p = 0.0003, blue data in C), -0.9 (p = 0.005, red data in E), Pearson correlation test. Solid line, best fitting sigmoid to the competitor response profile (r2 = 0.92 in C, 0.96 in E); black arrowhead, strength of S1 (0.68°).

Fig. S3 The response of Imc neurons for constant size single-target protocol (CSSP); A, Diagram of CSSP; B, C, Responses of an example Imc neuron for the objects with different sizes. B, Raster plot of responses of the example Imc neuron to Fig. S3A protocols. Shaded along the x-axis represents stimulus duration (500 ms) during which response firing rates were calculated. C, Response firing rates corresponding to raster plots in Fig. S3B. Open circles are response firing rates (mean±SEM); D, Responses of Imc neurons population for Fig. S3A protocols. The firing rates of each Imc neuron for different contrast stimuli are normalized by the peak firing rate.

Fig. S4 The response of Imc neurons for constant contrast single-target protocol (CCSP); A, Diagram of CCSP; B, C, Responses of an example Imc neuron for the objects with different contrasts. B, Raster plot of responses of the example Imc neuron to Fig. S4A protocols. Shaded along the x-axis represents stimulus duration (500 ms) during which response firing rates were calculated. C, Response firing rates corresponding to raster plots in Fig. S4B. Open circles are response firing rates (mean±SEM). Correlation coefficient of responses versus contrast strength = 0.97 (p <0.001, Pearson correlation test); D, Responses of Imc neurons population for Fig. S4A protocols. The firing rates of each Imc neuron for different contrast stimuli are normalized by the peak firing rate.
